# Supplementary material
Source: publisher figshare collection journal article supplement (https://frontiersin.figshare.com/ndownloader/files/17760299)
Supplement: Supplementary file [file 17760299]

### Supplementary Material

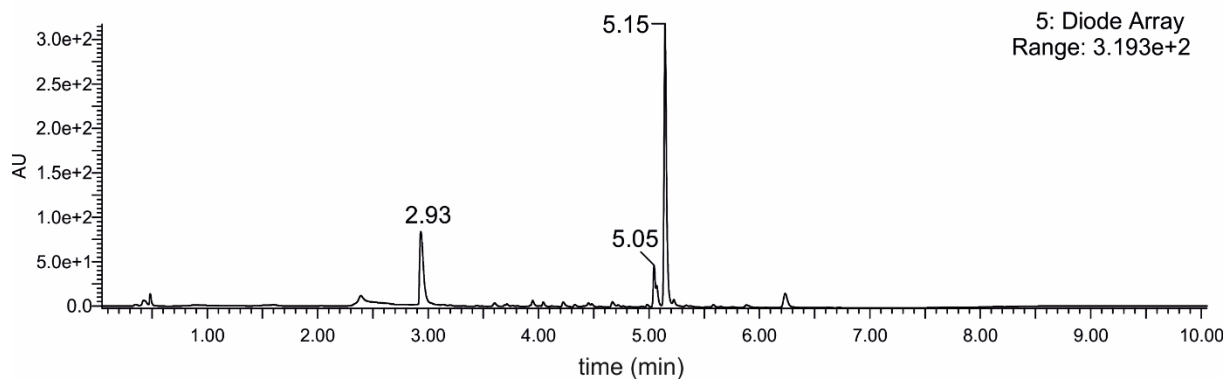

**Supplementary Figure 1.** UV traces of the UPLC-MS analysis of a mixture of BODIPY-cobaloxime **1** and 0.75 equivalents of Na<sub>2</sub>S showing three major absorption bands at 5.15, 5.05 and 2.93 min retention times assigned to the BODIPY ligand, the BODIPY-cobaloxime complex and HS<sup>-</sup> cobaloxime complex.

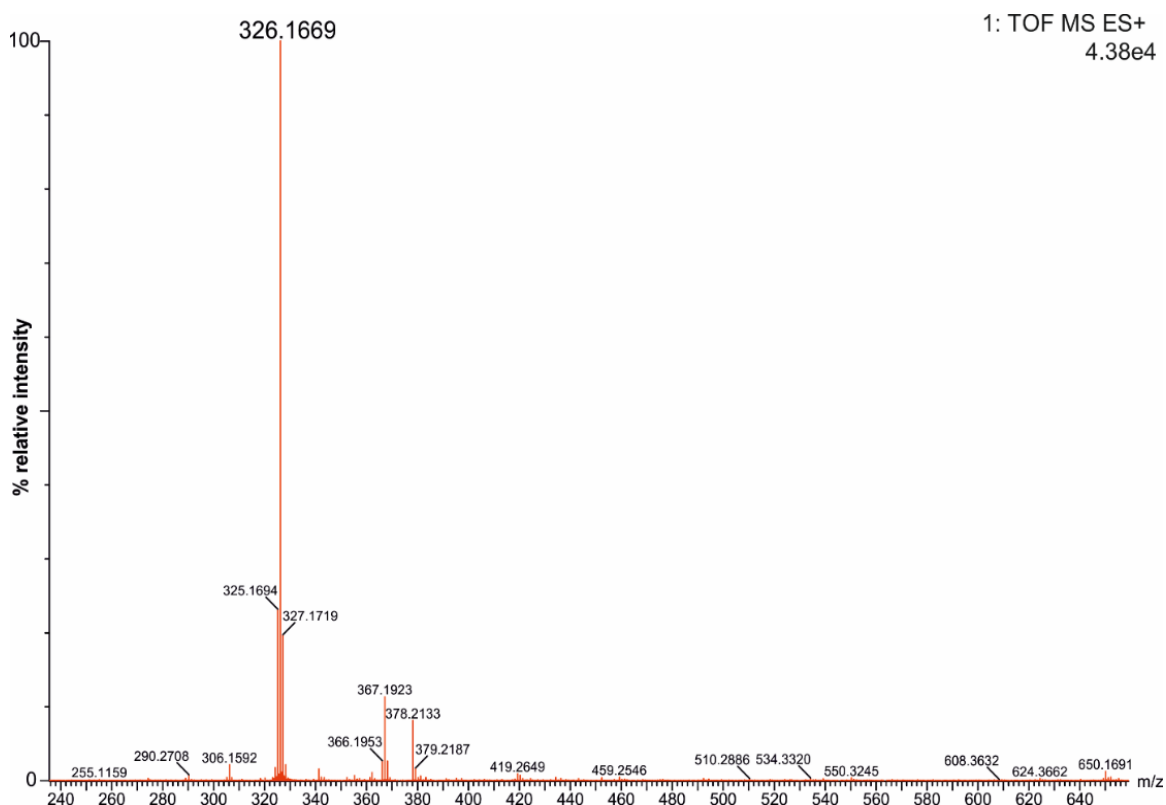

**Supplementary Figure 2.** ESI<sup>+</sup> mass spectrum corresponding to the absorption band at 5.15 min retention time of the UPLC-MS of a mixture of BODIPY-cobaloxime **1** and 0.75 equivalents of Na<sub>2</sub>S (see Supplementary Figure 1).

1: TOF MS ES+  
7.85e3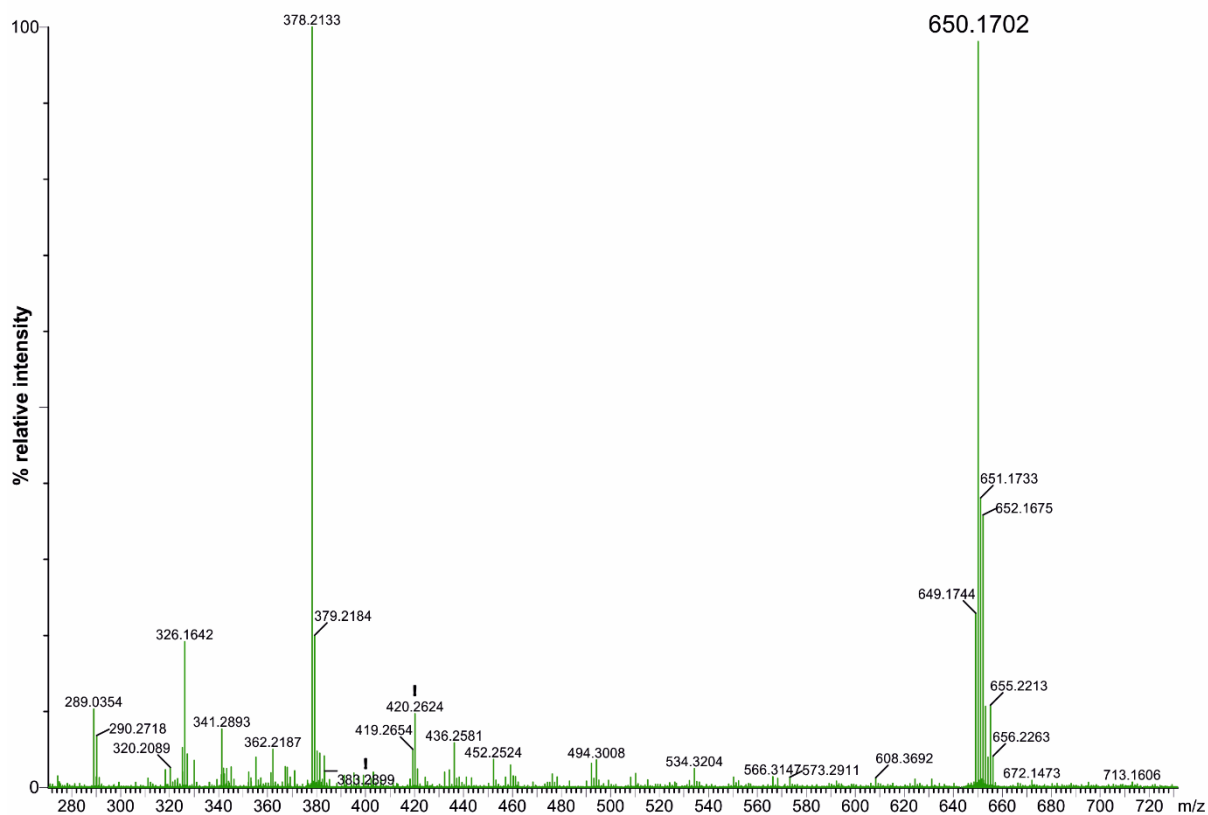

**Supplementary Figure 3.** ESI+ mass spectrum corresponding to the absorption band at 5.05 min retention time of the UPLC-MS of a mixture of BODIPY-cobaloxime **1** and 0.75 equivalents of Na<sub>2</sub>S (see Supplementary Figure 1).

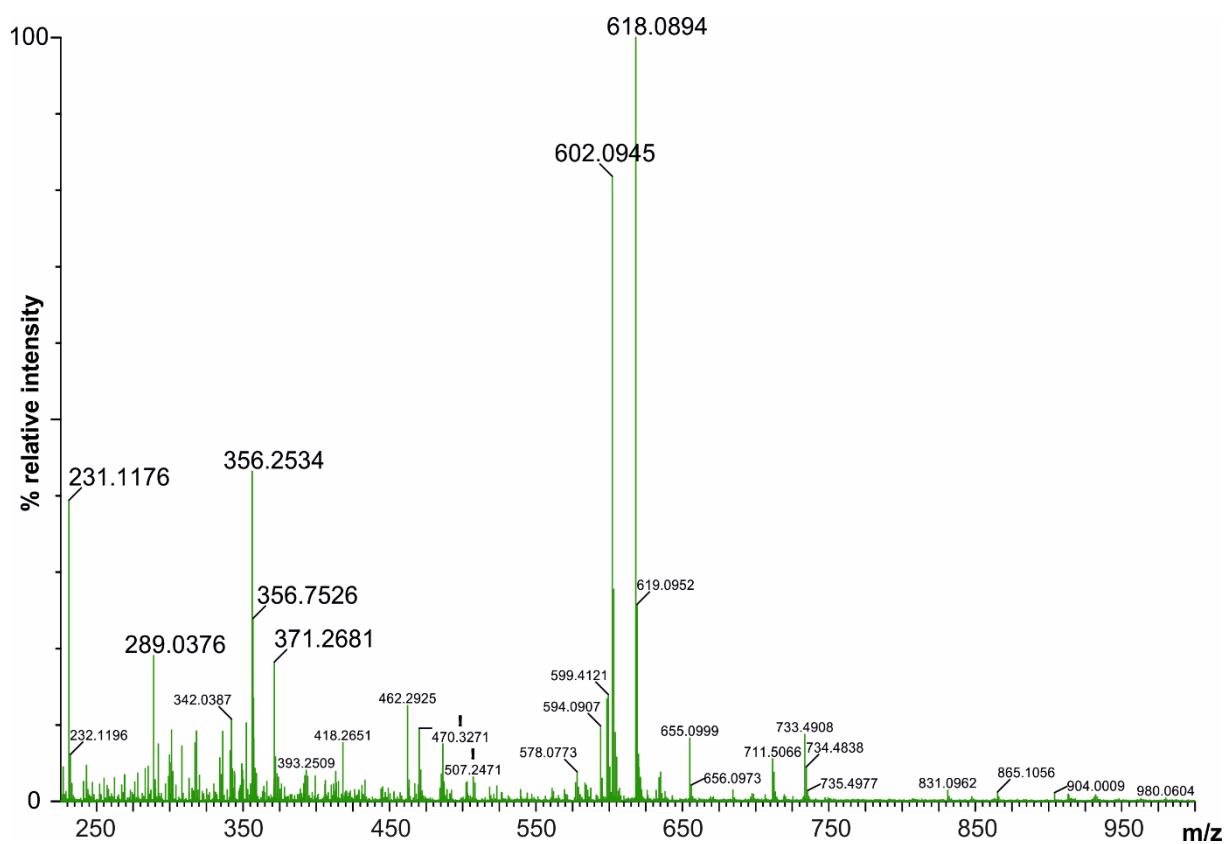

**Supplementary Figure 4.** ESI+ mass spectrum corresponding to the absorption band at 2.93 min retention time of the UPLC-MS of a mixture of BODIPY-cobaloxime **1** and 0.75 equivalents of  $\text{Na}_2\text{S}$  (see Supplementary Figure 1) showing the ion at  $m/z = 356$  assigned to the complex  $[\text{Co}(\text{dmgH})_2(\text{Cl})(\text{HS})]^+$ .
